# Supplementary material
Source: MDPI journal article supplement (https://www.mdpi.com/1424-8247/17/5/649)
Supplement: s1 [file s1]

**Supplementary Figure S1 Overlaid chromatograms of blank plasma alone and spiked at LLOQ level**

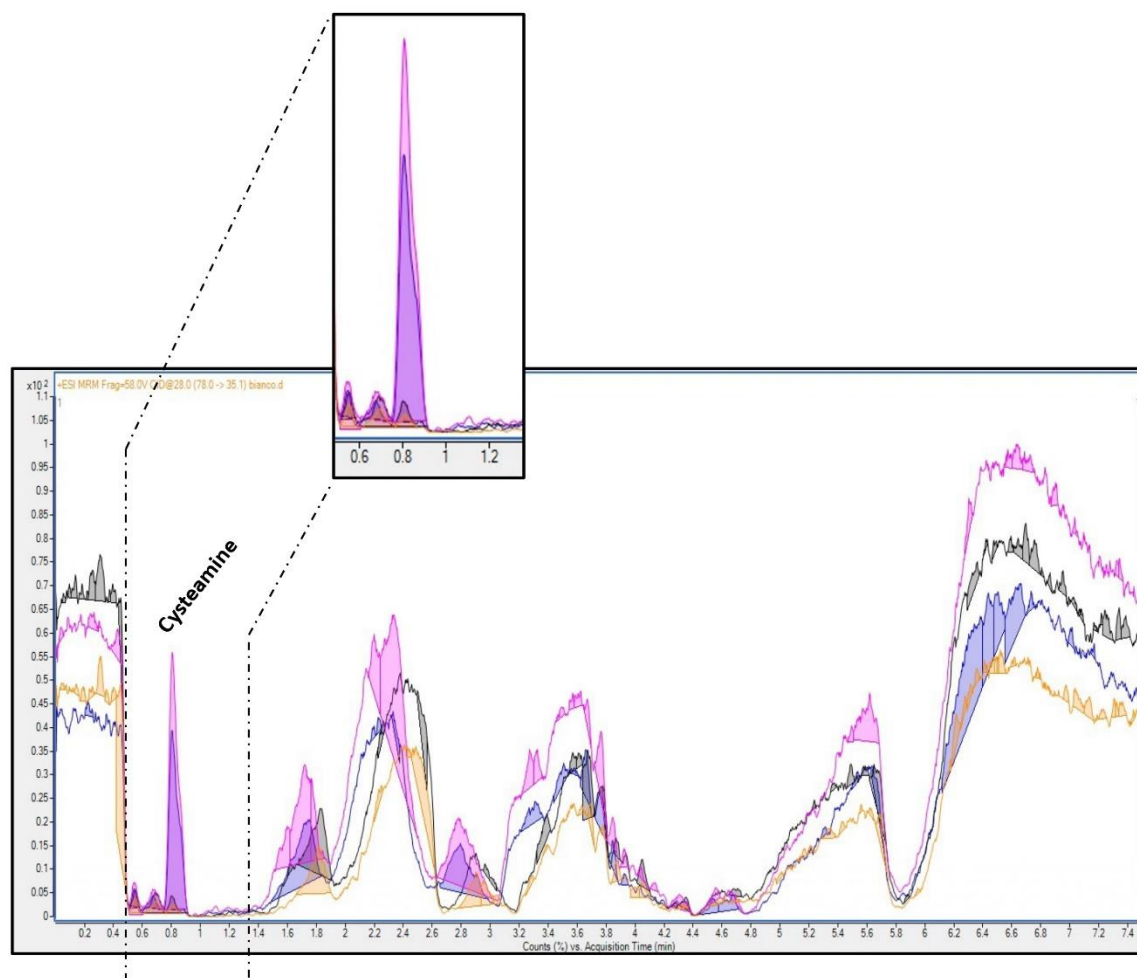

## Supplementary Figure S2 Mass spectrum results

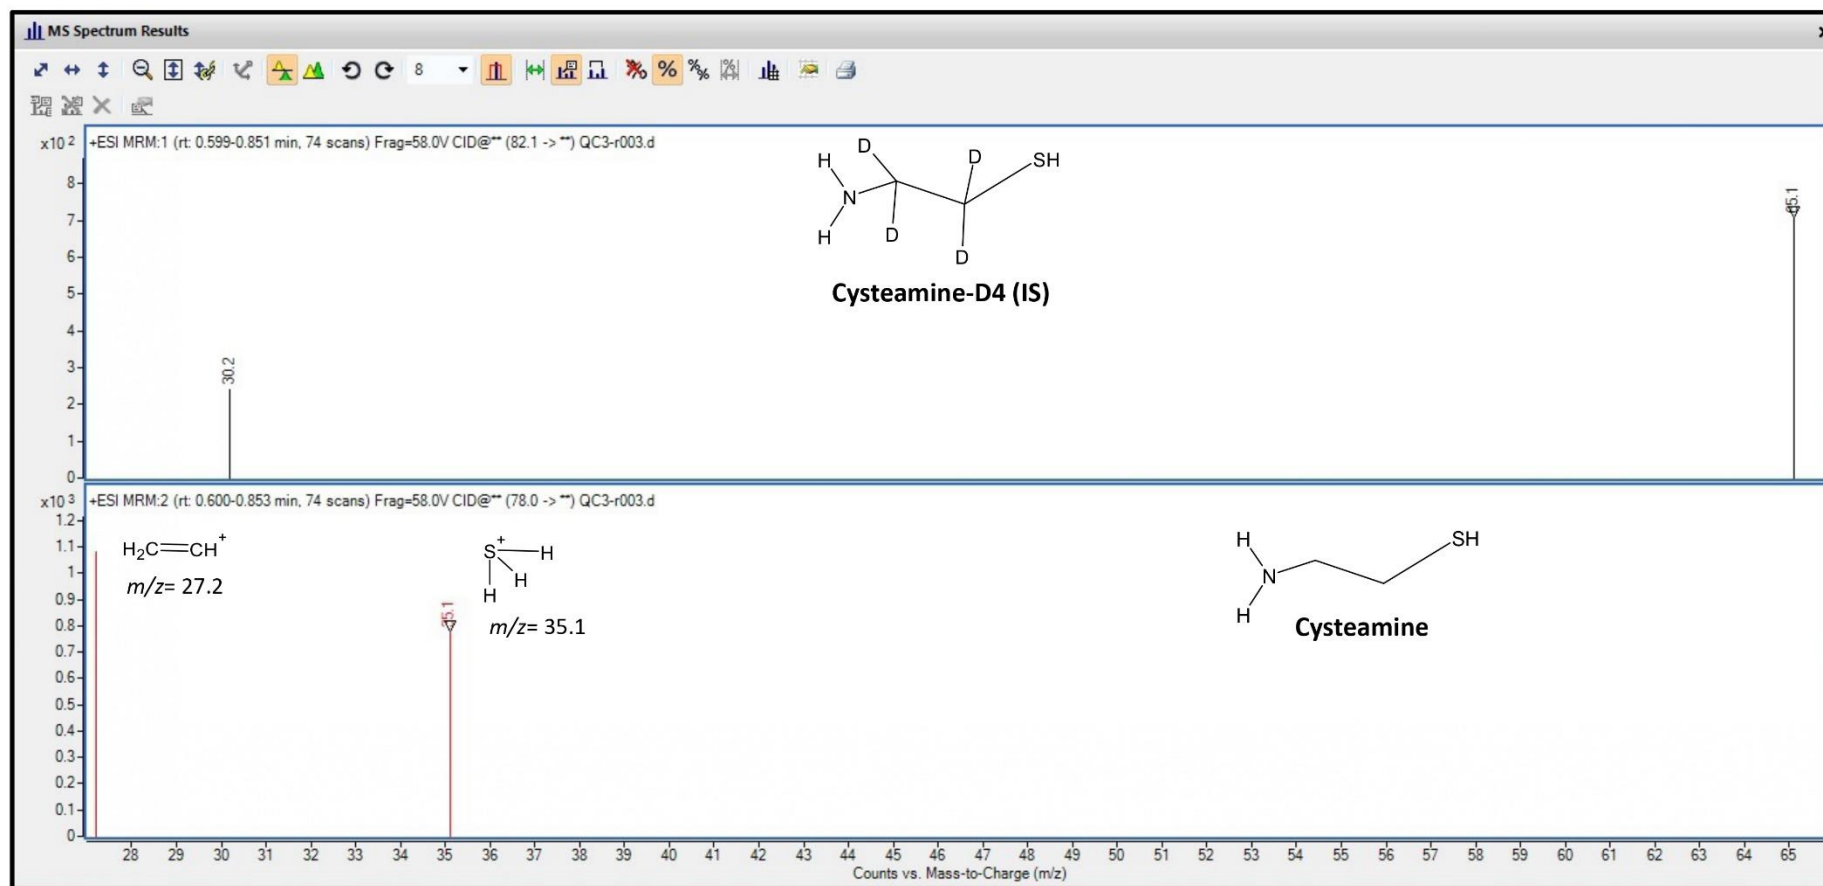

**Supplementary Table 1.** Comparison between bioanalytical method described here and previous published LC-MS/MS methods.

| Bioanalytical method       | Instrumentation                                                                                                                   | Chromatographic column                                                   | Elution mode and Mobile phases used                                                                                                              | Injection volume   | Flow- rate (mL/min) | Run- time    | Analysed matrix (required volume) | Disulfide-Reducing Agent              | Calibration range; LLOQ                   | Internal standard (IS) used  |
|----------------------------|-----------------------------------------------------------------------------------------------------------------------------------|--------------------------------------------------------------------------|--------------------------------------------------------------------------------------------------------------------------------------------------|--------------------|---------------------|--------------|-----------------------------------|---------------------------------------|-------------------------------------------|------------------------------|
| Method described here      | UHPLC Agilent 1290 Infinity II apparatus (Agilent Technologies) coupled with 6470 Mass Spectrometry system (Agilent Technologies) | InfinityLab Poroshell 120 HILIC 1.90 $\mu\text{m}$ (100 $\times$ 2.1 mm) | Gradient elution.<br><br>Mobile phase A (0.1 % formic acid in milli-q pure water);<br><br>Mobile phase B (0.1% formic acid in acetonitrile ACN); | 10.0 $\mu\text{L}$ | 0.5                 | 7.50 minutes | Plasma (50 $\mu\text{L}$ )        | Tris (2-carboxyethy) phosphine (TCEP) | 1-2000 $\mu\text{M}$ ; 0.50 $\mu\text{M}$ | D4- (deuterated) cysteamine  |
| Dohil R. et al., 2005 [19] | API 2000 LC-MS/MS, (Applied Biosystems)                                                                                           | LC-CN 2 cm $\times$ 4.0 mm I.D. 3 $\mu\text{m}$ particle size (Supelco)  | Isocratic elution.<br><br>Mobile phase (0.1% formic acid)                                                                                        | 20.0 $\mu\text{L}$ | 0.4                 | Not reported | Plasma (100 $\mu\text{L}$ )       | Tris (2-carboxyethy) phosphine (TCEP) | 1-100 $\mu\text{M}$                       | 2-dimethyl-ethane-aminothiol |

|                              |                                                                                                             |                                                                          |                                                                                                                                                                                                      |        |     |              |                 |                      |                    |                             |
|------------------------------|-------------------------------------------------------------------------------------------------------------|--------------------------------------------------------------------------|------------------------------------------------------------------------------------------------------------------------------------------------------------------------------------------------------|--------|-----|--------------|-----------------|----------------------|--------------------|-----------------------------|
| Bouazza N. et al., 2011 [15] | Agilent 1100 system (Agilent Technologies) coupled to Applied Biosystems/MDS Sciex API3000 MSMS             | XD8-C8 column 150 × 4.6 mm (Interchim)                                   | Isocratic elution.<br><br>Mobile phase [water/acetonitrile (410/90) with 0.1% formic acid].                                                                                                          | 5.0 µL | 0.6 | Not reported | Plasma (200 µl) | Dithiothreitol (DTT) | Not reported       | D4- (deuterated) cysteamine |
| Franzin M et al., 2022 [14]  | SCIEX ExionLCTM AD (AB Sciex) coupled with the mass spectrometer SCIEX Triple QuadTM 6500 + LC-MS/MS System | Poroshell Agilent 120 EC-C8 150 mm × 2.1 mm, 4 µm (Agilent Technologies) | Gradient elution.<br><br>Mobile phase A (water with 0.15% formic acid and 5 mM ammonium formate).<br><br>Mobile phase B (acetonitrile: water 95:5 with 0.15% formic acid and 5 mM ammonium formate). | 3.0 µL | 0.4 | 14 minutes   | Plasma (100 µL) | Dithiothreitol (DTT) | 2.5-50 µM; 1.25 µM | D6- (deuterated) cystine    |

For reference numbers see the main manuscript.

**Supplementary Table 2.** Gradient conditions reached during the chromatographic separation.

| Time<br>(min) | Mobile Phase<br>B (%) |
|---------------|-----------------------|
| 0             | 78                    |
| 1             | 78                    |
| 4             | 20                    |
| 4.5           | 20                    |
| 4.6           | 78                    |
| 7.5           | 78                    |
